# Supplementary material for: IL-10 Indirectly Downregulates IL-4–Induced IgE Production by Human B Cells
Source: PubMed Central journal article supplement (PMC8890443; doi:10.4049/immunohorizons.1800076), 2018-12-18
Supplement: NIHMS1056838-supplement-Suppl.pdf [file NIHMS1056838-supplement-Suppl.pdf]

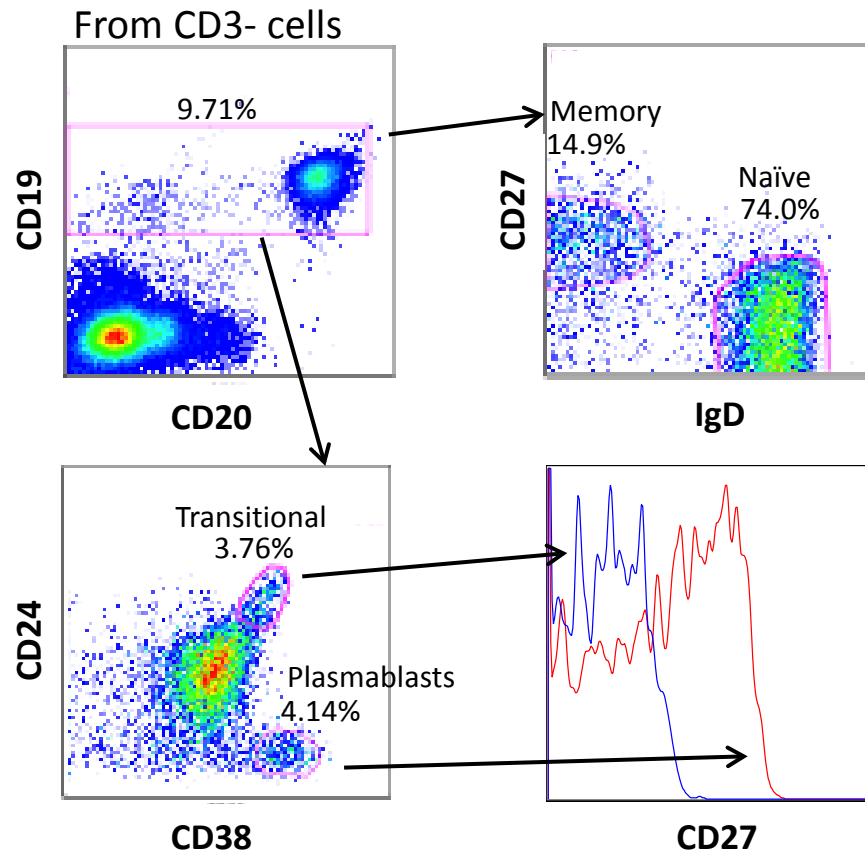

**SUPPLEMENTAL FIGURE 1.** Gating strategy and staining for B cell subsets. Cells expressing CD3 were first excluded; of the remaining cells, CD19+ cells were selected before examining staining for CD24 and CD38 (transitional and plasmablast subsets), and CD27 and IgD (naïve and memory subsets).

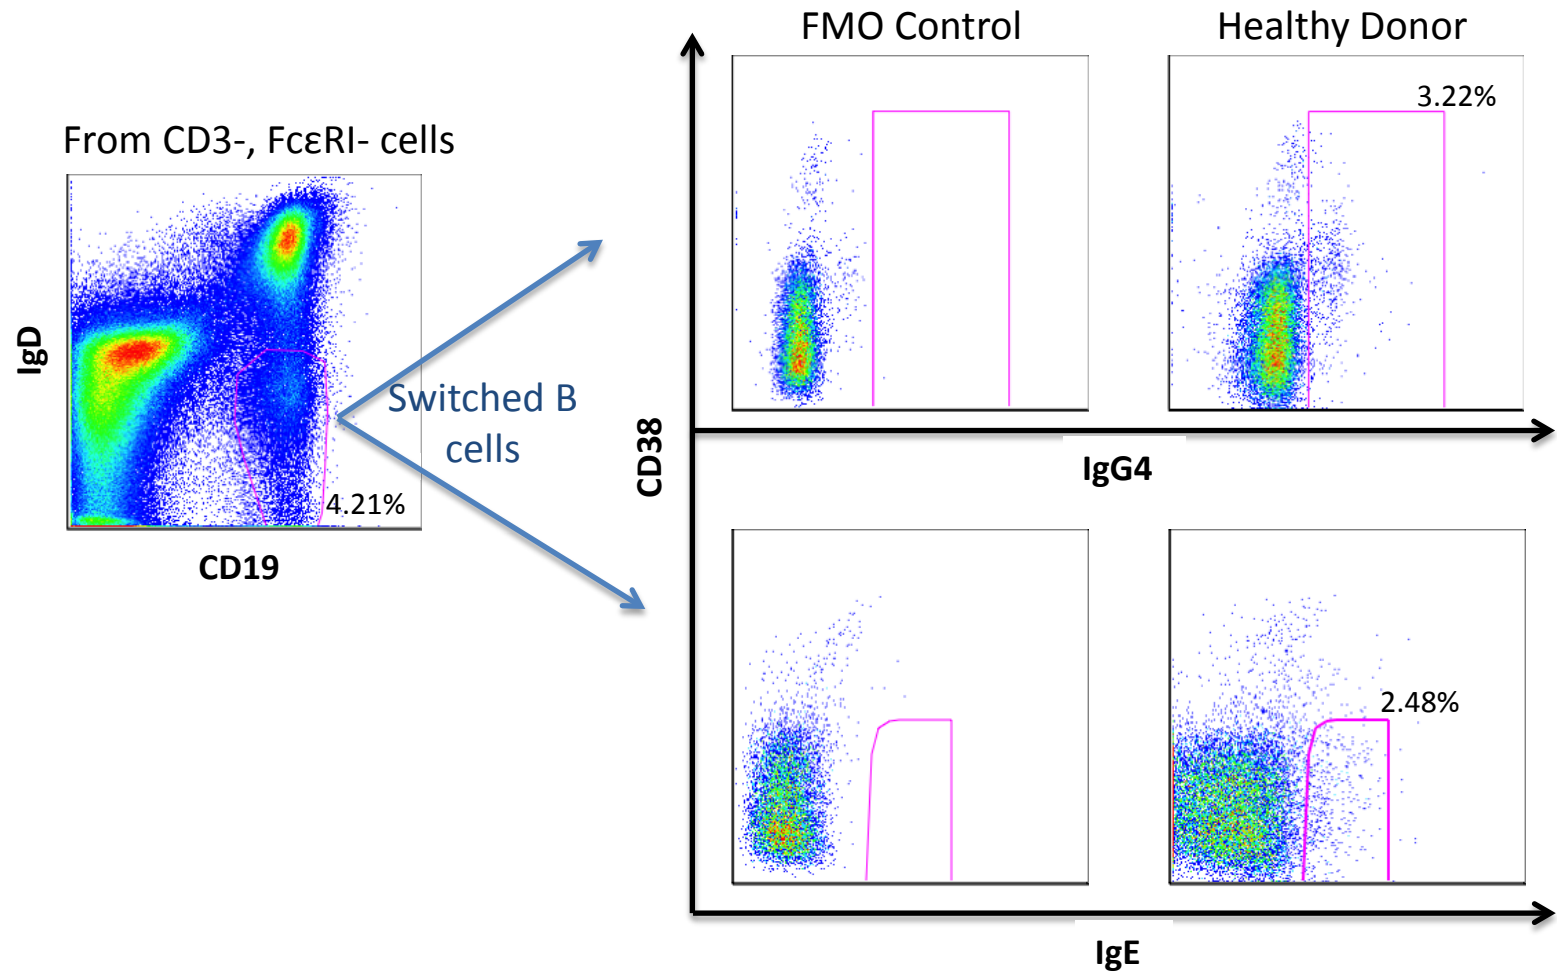

**SUPPLEMENTAL FIGURE 2.** Gating strategy and staining for IgE+ and IgG4+ B cells. Cells expressing CD3 and FcεRI were first excluded; of the remaining cells, CD19+ IgD- cells were selected before examining staining for IgE and IgG4. Left panels denote fluorescence minus one (FMO) controls for IgG4 and IgE. Right panels show staining in unstimulated cells.

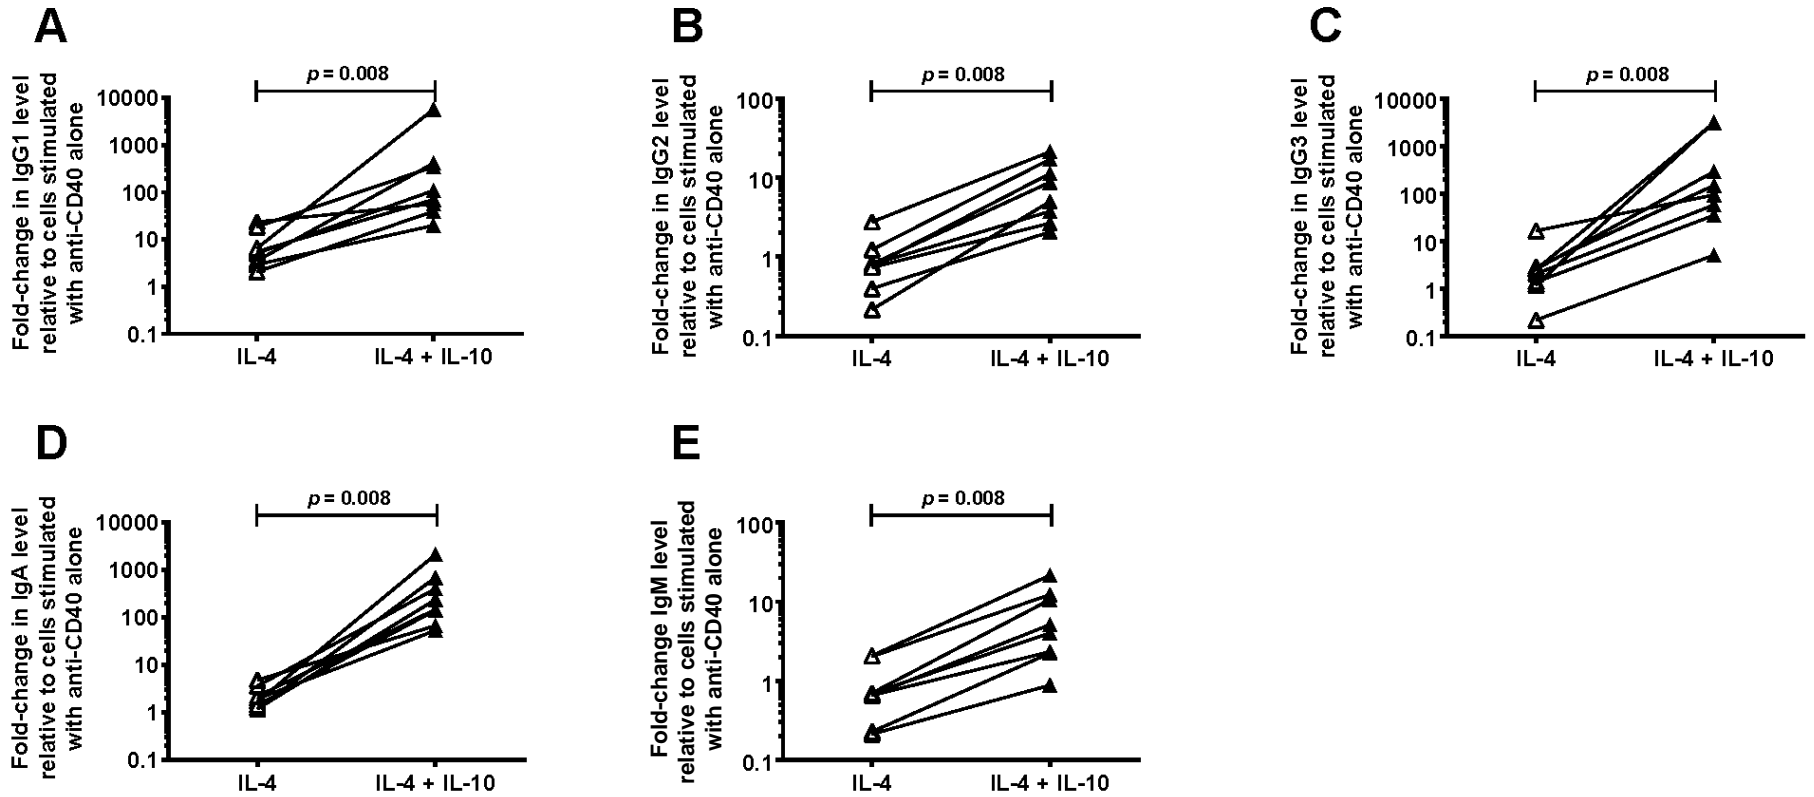

**SUPPLEMENTAL FIGURE 3.** IL-10 enhances the IL-4-induced production of non-IgE isotypes. Fold change in levels of IgG1 (A), IgG2 (B), IgG3 (C), IgA (D), and IgM (E) in culture supernatants of isolated total B cells stimulated with anti-CD40 and IL-4 with (filled triangles) and without (open triangles) IL-10, relative to B cells cultured with anti-CD40 antibody alone.  $n = 8$ .  $p$  values were determined using Wilcoxon matched-pairs signed rank test.
